1 **From Habitat Use to Social Behavior: Natural History of a**  
2 **Voiceless Poison Frog, *Dendrobates tinctorius***

3

4 *Bibiana Rojas*<sup>1\*</sup> & *Andrius Pašukonis*<sup>2,3</sup>

5

6 <sup>1</sup>*Department of Biological and Environmental Sciences, University of Jyväskylä, PO Box 35, FI-40014,*

7 *Finland*

8 <sup>2</sup>*Department of Cognitive Biology, University of Vienna, Althanstrasse 14, 1090, Vienna, Austria*

9 <sup>3</sup>*Department of Biology, Stanford University, 371 Sierra Mall, Stanford, CA 94305, USA*

10

11 Corresponding Author:

12 Department of Biology and Environmental Sciences, University of Jyväskylä, P.O. Box 35, FI-

13 40014, Finland

14 Email address: [bibiana.rojas@jyu.fi](mailto:bibiana.rojas@jyu.fi)

15

## 16 Abstract

17

18 Descriptive studies of natural history have always been a source of knowledge on which experimental  
19 work and scientific progress rely. Poison frogs are a well-studied group of small Neotropical frogs with  
20 diverse parental behaviors, distinct calls, and bright colors that warn predators about their toxicity; and a  
21 showcase of advances in fundamental biology through natural history observations. The dyeing poison  
22 frog, *Dendrobates tinctorius*, is emblematic of the Guianas region, widespread in the pet-trade, and  
23 increasingly popular in research. This species shows several unusual behaviors, such as the lack of  
24 advertisement calls and the aggregation around tree-fall gaps, which remain poorly described and  
25 understood. Here, we summarize our observations from a natural population of *D. tinctorius* in French  
26 Guiana collected over various field trips between 2009 and 2017; our aim is to provide groundwork for  
27 future fundamental and applied research spanning parental care, animal dispersal, disease spread, habitat  
28 use in relation to color patterns, and intra specific communication, to name a few. We report sex  
29 differences in habitat use and the striking invasion of tree-fall gaps; describe their courtship and  
30 aggressive behaviors; document egg development and tadpole transport; and discuss how the knowledge  
31 generated by this study could set the grounds for further research on the behavior, ecology, and  
32 conservation of this species.

33

34

## 35 Introduction

36

37 Natural history has been long acknowledged as the foundation of new hypotheses in behavioral and  
38 evolutionary ecology (Endler 2015). Thus, scientific progress relies greatly on knowing what different  
39 organisms are, where they live, what they feed on, how they respond to different stimuli, and what kind of  
40 other peculiar behaviors they exhibit (Tewksbury et al. 2014). This, more often than not, is achieved  
41 through field observations.

-

42 Neotropical poison frogs (Dendrobatidae) and their close relatives are a showcase example of how  
43 detailed knowledge of natural history can lead to groundbreaking hypothesis-driven studies (e.g. Santos et  
44 al. 2003; Brown et al. 2010; Amézquita et al. 2011; Pašukonis et al. 2014; Tarvin et al. 2017). Exhaustive  
45 field observations have revealed the diversity of poison frog parental care behavior (e.g. Crump 1972;  
46 Silverstone 1973; Donnelly 1989; Summers 1989; Caldwell 1997), warning coloration (e.g. Silverstone  
47 1975; Myers and Daly 1983), and skin alkaloids (e.g. Myers and Daly 1976, 1980; Brodie and  
48 Tumbarello 1978; Myers et al. 1978; Summers 1989), aspects that have become a trademark in the group  
49 both for research and for the pet-trade. However, there is still a surprising lack of information on the  
50 natural history of some species that have become increasingly well studied otherwise, such as the dyeing  
51 poison frog, *Dendrobates tinctorius*.

52 Although bred in captivity by hobbyists for decades (Schmidt and Henkel 1995; Lötters et al. 2007), and  
53 despite its growing status as a model species for studies on the evolution and function of coloration (e.g.,  
54 Wollenberg et al. 2008; Noonan and Comeault 2009; Rojas et al. 2014a, 2014b; Barnett et al. 2018), there  
55 are only a handful of studies on *D. tinctorius* in its natural environment; most of these have been carried  
56 out and published only after 2010 (Born et al. 2010; Courtois et al. 2012; Rojas and Endler 2013; Rojas  
57 2014, 2015; Rojas et al. 2014a). Four other studies in the wild have attempted to understand evolutionary  
58 aspects of their variable coloration, using clay or wax models instead of the actual frogs (Noonan and  
59 Comeault 2009; Comeault and Noonan 2011; Rojas et al. 2014b; Barnett et al. 2018).

60 Many poison frog field studies over the last five decades have relied on prominent male calls either  
61 directly, by studying aspects related to vocal behavior (e.g., Fandiño et al. 1997; Lötters et al. 2003;  
62 Forsman and Hagman 2006; Erdtmann and Amézquita 2009; Vargas-Salinas and Amézquita 2013), or  
63 indirectly, by using the calls to locate territorial males in the field (e.g., Bee 2003; Hödl et al. 2004;  
64 Amézquita et al. 2005; Rojas et al. 2006). Meanwhile, *D. tinctorius* remained almost unstudied, at least in  
65 part, due to their lack of a regular calling behavior. Therefore, much of the behavioral and evolutionary  
66 ecology of dyeing poison frogs remains unknown.

67 As stated by the IUCN Red List for Threatened Species, *D. tinctorius* is in the category ‘Least Concern’  
68 (Gaucher and MacCulloch 2010). According to this report, its major threat is illegal trading, as it is for  
69 various other dendrobatid species (Gorzula 1996; Nijman and Shepherd 2010; Brown et al. 2011;  
70 Hoogmoed et al. 2012). However, a recent study provided evidence that, despite having seemingly large  
71 and stable populations throughout its range, *D. tinctorius* is not safe from the chytrid fungus (*Bd*)  
72 infection (which, incidentally, was discovered in a captive individual of *D. tinctorius*; Longcore et al.  
73 1999) in its natural habitat (Courtois et al. 2012). Moreover, a recent study by Courtois et al. (2015)  
74 raised even greater concern as, of all the species tested for *Bd* in French Guiana, the highest prevalence  
75 was found in dendrobatid frogs, including *D. tinctorius*.

76 Alarming declines make it even more urgent to study the natural history of amphibian species and  
77 communities, especially of ‘sentinel’ species such as *D. tinctorius* (Courtois et al. 2015), whose declines  
78 provide anticipated warning of risks to human or ecosystem health (Beeby 2001). Only by understanding  
79 organisms in their own habitat can we produce sensible and timely conservation policies, and sustainable  
80 management (Tewksbury et al. 2014). In the particular case of *D. tinctorius*, knowing their habitat use,  
81 breeding biology, social behavior, and movement ecology could be of utmost importance for modeling  
82 disease spread and the impacts of deforestation, among other current environmental threats. Here, we  
83 document the habitat use, and the reproductive, social, and vocal behaviors of *D. tinctorius* in the wild;  
84 and provide information about various other aspects of its natural history that will be a valuable  
85 groundwork for future fundamental and applied research in behavior, ecology, evolution, and  
86 conservation.

## 87 88 **Materials & Methods**

### 89 90 **Study species**

91 *D. tinctorius* is a diurnal, relatively large (Snout-Vent Length 37—53mm at the study site; Rojas and  
92 Endler 2013) poison frog of the Neotropical family Dendrobatidae (more specifically of the *tinctorius*  
93 group; Grant et al. 2006), which occurs around canopy gaps in primary forests in the Eastern Guiana



94 Shield, at elevations between 0 and 600 m (Noonan and Gaucher 2006; Wollenberg et al. 2006). It has  
95 skin alkaloids (Daly et al. 1987), and is characterized by a great color pattern variation both within (Fig.  
96 1a; Rojas and Endler 2013) and among populations (Fig. 1b; Noonan and Gaucher 2006; Wollenberg et  
97 al. 2008).

98 In our study area, color patterns can be used reliably for individual identification (Born et al. 2010;  
99 Courtois et al. 2012; Rojas and Endler 2013; Fig. 1a), and sex can be determined by the size of males' toe  
100 discs, which are wider than females' in relation to their body size (Rojas and Endler 2013). In contrast to  
101 most frogs (including closely related poison frogs), male *D. tinctorius* do not produce advertisement calls,  
102 and when they do vocalize, they do it very softly (Lescure and Marty 2000). Newly hatched tadpoles are  
103 carried by males to pools formed in tree-holes or palm bracts at variable heights (Fig.2; Supplementary  
104 video 1; Rojas 2014, 2015), where they remain unattended until metamorphosis, which occurs after  
105 approximately two months (BR, pers. obs. in the field). As in some other species of *Dendrobates*  
106 (Caldwell and De Araujo 1998, Gray et al. 2009, Summers 1990, Summers and McKeon 2004), larvae  
107 feed on detritus and on larvae of insects and frogs (BR, pers. obs.), including conspecifics (Rojas 2014,  
108 2015; Supplementary movie 2). In captivity, individuals reach maturity after approximately 18 months  
109 (Lötters et al. 2007), but their age at sexual maturity in the field is unknown to date.

110

### 111 **Reproductive and social behavior**

112 BR did systematic data collection during three field seasons between 9 January and 20 February 2009, 17  
113 January and 19 March 2010, and 17 January and June 6 2011, at Camp Pararé, Nouragues Ecological  
114 Research Station, French Guiana (4°02'N, 52°41'W), in primary lowland terra-firme forest, where *D.*  
115 *tinctorius* is one of the most common leaf-litter frogs (Courtois, et al. 2013). In addition, AP made  
116 opportunistic observations on social and reproductive behavior at the same study site between January  
117 and March 2016 and 2017. The study periods correspond to the early rainy season and high reproductive  
118 activity of *D. tinctorius* in the study area.

119 During each study period between 2009 and 2011, BR surveyed a 1.5 km transect on a near-daily basis,  
120 between 8:00 and 17:30. Each frog found was captured, when possible, and photographed for future  
121 individual identification on the basis of its color patterns. When two individuals seemed to be interacting,  
122 they were followed for as long as it was necessary to determine the nature of the interaction (i.e. courtship  
123 or agonistic encounter). Two individuals were considered to be in courtship when they were less than 1  
124 m apart (as in Pröhl 2002) and one was clearly following and touching the other (pers. obs.) for at least 15  
125 min. A 15 min waiting time was chosen on the basis of previous studies of mate choice and assortative  
126 mating in captive dendrobatids (Maan and Cummings 2008, 2009). When possible, we followed pairs in  
127 courtship until they were no longer visible or until oviposition occurred, which proved difficult most of  
128 the time due to lack of accessibility and poor visibility under forest structures. Agonistic encounters were  
129 more difficult to follow because of their usually short duration and the high movement speed of the frogs,  
130 but we observed them for as long as both individuals were visible. Fragments of the two types of  
131 interactions were filmed for documentation purposes. Observations were done at irregular time intervals  
132 during the day.

133 Males carrying tadpoles were found during daily surveys along a 1.5 km transect. BR recorded the  
134 number of tadpoles on the back of each tadpole-carrying male and captured it when possible. Upon  
135 capture, each male was photographed (with the tadpole(s) still attached) against graph paper. Later these  
136 photos were used to measure the size of both the frog and the tadpoles with the software ImageJ  
137 (Schneider et al. 2012). Tadpole size was measured dorsally, from the tip of the snout to the base of the  
138 tail. The sizes of tadpoles carried by one male at the same time were compared (always the small vs. the  
139 large of each pair) with a paired *t*-test.

140

#### 141 **Vocal behavior**

142 *Dendrobates tinctorius* vocalizes rarely and at very low intensities, making it difficult to obtain audio  
143 recordings. We were able to obtain a high-quality audio recording of one male. In addition, to measure  
144 the acoustic properties of the call, we extracted lower quality audio from video recordings of social

145 interactions. In total, we obtained sufficient quality recordings of eight calls produced by three males  
146 (four, three, and one call per individual). We manually measured the duration, pulse rate and dominant  
147 frequency of each call using Praat (v. 5.3.85; Boersma and Weenink 2014) acoustic analysis software.  
148 We averaged the measures between calls within each male and then between the three males. We used  
149 one call of the highest quality to visually illustrate call structure.

150

### 151 **Treefall-gap invasion**

152 In a previous study, Born et al. (2009) reported frequent sightings of adult *D. tinctorius* in recently  
153 formed tree-fall gaps. BR witnessed the formation of nine tree-fall gaps over the study periods (one in  
154 2009, eight in 2011); these were discovered rapidly because they occurred in the 1.5 km transect surveyed  
155 daily. BR inspected each gap within the first 24 hours of its formation and caught as many frogs as  
156 possible, moving fallen branches until no frogs were seen (after 2-3 hours). During the next two  
157 consecutive days BR carefully looked for new frogs over a similar period of time (2-3 h); most of the  
158 individuals seen then had been found on the first day. When frogs were seen but not caught, BR  
159 photographed them from a distance to record their color pattern for further identification upon capture.  
160 The presence of individuals in these tree-fall gaps continued to be recorded during daily surveys for up to  
161 two months after their occurrence.

162

### 163 **Habitat use**

164 During the field season of 2010, BR captured 109 frogs (55 females and 54 males), each of which was  
165 assigned to one of two microhabitats according to where they were first seen: leaf litter (when frogs were  
166 on a relatively open patch of leaf litter without any obvious structure in a 1 m radius), or associated to the  
167 following structures: fallen logs (when frogs were visibly exposed on top of the log), fallen branches  
168 (when individuals were in fallen tree crowns) and tree/palm roots (when the frogs were within the  
169 exposed roots or next to them, or inside hollow trunks). Frogs were only included in the analyses once  
170 (recaptures of the same individual were excluded in order to avoid pseudoreplication, and only the site at

171 first sighting was taken into account). We tested for differences between the sexes in the microhabitat  
172 where they were found (open vs. associated with the aforementioned structures) using a Generalized  
173 Linear Model with binomial distribution. All statistical analyses were done with the software R v. 3.3.3  
174 (RCoreTeam 2014) using the RStudio interface (RStudio Team 2015).

175

## 176 **Ethics statement**

177 Our research was approved and authorized by the scientific committee of the Nouragues Ecological  
178 Research Station. We strictly adhered to the current French and European Union law, and followed the  
179 Association for the Study of Animal Behaviour's (ASAB) Guidelines for the use of live animals in  
180 teaching and research.

181

## 182 **Results**

183

184 During three field seasons between 2009 and 2011, we identified 629 individuals unequivocally, 597 of  
185 which were captured. We photographed the remaining 32 frogs from a distance that allowed the record of  
186 their unique color patterns and, thus, their individual identification. There was no statistically significant  
187 difference between the number of females (N=276) and the number of males (n=321) found, although  
188 there was a non-significant trend towards a larger number of males ( $\chi^2 = 3.392$ ,  $df = 1$ ,  $P = 0.066$ ).

189

## 190 **Habitat use**

191 We found clear differences between the sexes in terms of the microhabitat where they were found.  
192 Females were predominantly found in open areas of leaf litter (60% of females vs. 31.5% of males),  
193 whereas males were mostly found associated to structures (68,5% of males vs. 40% of females; estimate  $\pm$   
194 SE =  $1.183 \pm 0.402$ ,  $Z = 2.943$ ,  $P < 0.001$ ,  $n=109$ ; Fig. 3), specially fallen logs and branches (31.5% and  
195 22.2%, respectively).

196

## 197 **Invasion of treefall gaps**

198 A total of 140 individuals (65 females and 75 males) arrived in the nine fresh gaps studied, mostly on the  
199 same day of their occurrence or within the first three days. Males were as likely as females to arrive  
200 within this timespan (males: mean =  $1.24 \pm$  (SE) 0.08 d; females: mean =  $1.08 \pm$  (SE) 0.06 d;  $\chi^2 = 0.714$  df  
201 = 1,  $P = 0.398$ ; Fig. 4A). In the long-term (i.e., up to 60 days after the occurrence of the treefall),  
202 however, more males than females were found in treefall gaps ( $\chi^2 = 11.137$ , df = 1,  $P = 0.001$ ; Fig. 4B).

## 203 204 **Vocal behavior**

205 *Dendrobates tinctorius* produces a call that can be described as a very low intensity ‘buzz’  
206 (Supplementary sound file). The call is audible to humans only from within a few meters; at times males  
207 inflate the vocal sac without anything audible to us from a distance of up to 1 m. Males call rarely and  
208 only when in courtship or during agonistic interactions with other males. We never observed a male  
209 calling alone. We were able to record and measure calls from two males in courtship and one in an  
210 agonistic interaction. Calls produced in courtship and agonistic contexts sounded similar to us and had  
211 similar acoustic parameters, although more recordings would be needed for a detailed comparison. All  
212 measured calls shared the same general structure: a short broadband burst of pulses produced at a high  
213 rate (Fig. 5B, C). The measured call duration was 0.55–0.98 s (mean = 0.76 s), the within-call pulse rate  
214 was 143–175 Hz (mean = 160 Hz), and the dominant frequency band centered around 2700–3270 Hz  
215 (mean = 3109 Hz).

## 216 217 **Courtship and egg laying**

218 We found 47 pairs engaged in courtship (10 in 2009, 14 in 2010 and 23 in 2011), involving 40 males and  
219 39 females. Courtship was observed throughout the day and lasted several hours. In one case a courting  
220 pair was followed for nearly 7 hours before oviposition took place. Courtship consists of several bouts of  
221 moving together and stationary tactile interactions (Fig. 5A, Supplementary video 3) that are interrupted,  
222 for example, when one of the individuals starts to feed. In general, each bout is initiated by tactile  
223 interactions in which the female repeatedly places one of her forelimbs on the male’s limbs, back or head.

224 The male then usually faces her before moving away, followed by the female, in search of an egg-laying  
225 site. When a female stops following for several minutes, for example because she starts to forage, the  
226 male usually turns back and calls. Males also produce the same soft calls and vocal sac movements  
227 during some tactile interactions and following bouts. If the female does not approach the male, he  
228 occasionally approaches her and touches her head or back. Altogether, the courtship sequence in *D.*  
229 *tinctorius* appears to be very similar to that in *D. auratus* (Wells 1978), with females taking the most  
230 active role. Both males and females vibrate the second digit of the hind-legs at high frequency ('toe  
231 trembling', *sensu* Hödl and Amézquita 2001; see Supplementary video 3) during courtship. Toe-  
232 trembling behavior can also be observed during foraging and agonistic interactions.

233 The courting pair does not seem to move over great linear distances (mean = 4.5 m; range, 0–8 m; n = 6),  
234 but moves in circles within an area of a few square meters instead. Every now and then the pair stops at  
235 certain places under the leaves or inside a hollow trunk, and the female starts to move in circles on the  
236 same spot, with alternating movements of her hind limbs in what appears as wiping of the leaves (See  
237 Supplementary video 4). The pair sometimes rests on the same spot for several minutes and the tactile  
238 interactions increase considerably during these breaks. More often than not, the pair does this a few  
239 times, at different places, before they choose the place where egg laying occurs.

240 In addition to the clutches laid by pairs we followed during courtship (n= 3), we found 18 clutches (for a  
241 total of 21) with 2–5 embryos (mean = 3.6) at different developmental stages. The eggs were laid under  
242 or within fallen logs and other wooden structures, leaf-litter, palm bracts and leaves, and animal burrows,  
243 usually completely sheltered from the rain (Fig 6A, B). Egg diameter is ~ 4.2 mm and hatching occurs  
244 after approximately two weeks (BR, pers. obs.; Fig. 6A). Eleven clutches were followed during  
245 development and only 14 out of 46 embryos (30,4 %) from eight out of 11 clutches survived until  
246 hatching. Other embryos did not develop, were destroyed by fungus, or disappeared possibly due to  
247 predation, although no predation was observed directly. Twelve clutches in total were observed with 1–4  
248 (mean = 2.2) tadpoles ready for male transport (Fig. 6C). Males were found occasionally sitting near or  
249 on top of egg clutches, most likely inspecting and moistening them.

250

## 251 Larval development and patterns of tadpole transport

252 Hatching occurs after approximately 14 days (Fig. 6), but the tadpoles may remain viable in the clutch for  
253 several days before being transported (AP, pers. obs.). The male eventually returns and sits on the clutch,  
254 allowing the tadpoles to wriggle on his back, and takes them to suitable bodies of water where they will  
255 remain unattended until metamorphosis, feeding on detritus and the larvae of some insects (e.g., Diptera  
256 and Odonata) and other frogs (pers. obs.), even conspecifics (Fig. 7A; Rojas 2014, 2015). Tadpole  
257 mouthparts are well suited for their carnivorous diet, with hardened serrated jaw sheath (Silverstone 1975;  
258 Fig. 7B). Size at metamorphosis ranges 10.94–15.62 mm (mean =  $13.15 \pm (\text{SE}) 0.24$  mm,  $n=24$ ), and at  
259 that point the color patterns are already completely visible (Fig. 2D).

260 We found 102 males (7 in 2009, 17 in 2010 and 78 in 2011) carrying one (Fig. 8A 79.4%), two (18.6%) or  
261 three (2.0%) tadpoles (mean =  $1.23 \pm (\text{SD}) 0.465$ ; Fig. 8c) ranging 4.78–6.87 mm long (from the tip of the  
262 snout to the base of the tail; mean =  $5.52 \pm (\text{SD}) 0.50$  mm). On one exceptional occasion BR also found  
263 one female carrying two tadpoles with a visible difference in size (Fig. 8B). Pairs of tadpoles transported  
264 by a male simultaneously differed significantly in size (paired *t*-test:  $t= 4.719$ ,  $df=13$ ,  $n=14$ ,  $P < 0.01$ ; Fig.  
265 8D). The tadpoles of the two males carrying three at a time ( $n=2$ ) were excluded from this analysis.  
266 Some males carrying more than one tadpole were seen depositing one of them in a pool and leaving with  
267 the second tadpole still attached to their back, whereas other males were seen depositing their two  
268 tadpoles in the same pool, at the same time. Some males were also seen visiting more than one pool  
269 before the tadpole(s) detached from their back. The visits consisted of jumping into the pool and  
270 sometimes repeatedly diving inside for several minutes while the tadpole remained attached (see  
271 Supplementary video 1).

272

## 273 Aggressive behavior

274 We observed 23 agonistic encounters involving both male - male ( $n = 10$ ) and female - female ( $n = 13$ )  
275 pairs. On one occasion, a male shortly attacked a female while attacking another male but resumed

276 courting the same female shortly after. The agonistic interactions ranged from short instances of chasing  
277 without any physical contact to prolonged continuous physical combat lasting at least 20 min.  
278 In both sexes, the physical fights involved kicking, jumping on each other's back, and pressing either the  
279 head or the dorsum against the substrate (Fig. 9; Supplementary video 5). In most cases, we were unable  
280 to identify the origin of the conflict, but it seemed to occur both in the presence and absence of an  
281 individual of the opposite sex. While this was not always the case, both male and female aggressive  
282 interactions were observed while one of the contestants was involved in courtship. For example, on one  
283 occasion, while observing a courting pair in which the female was following the male closely, a second  
284 female who had been under a log suddenly appeared and immediately assaulted the courting female. The  
285 intruding female jumped on top of the courting female, trying to press the body of the latter against the  
286 substrate. The courting female recovered, and tried to go on top of the intruder, and these alternating  
287 attacks rapidly became a seemingly intense physical combat, in which movements and attacks occurred at  
288 a high speed. The male turned away from the females and started to call at a high repetition rate. The  
289 combat lasted for about ten minutes at the end of which the intruder female moved away, presumably  
290 defeated by the courting female. The courting pair continued to be together for a couple more hours until  
291 egg-laying occurred. On other occasions, we noticed the presence of a female in the vicinity of two males  
292 engaged in a physical combat after which one of the males courted the female while the other moved  
293 away. Some agonistic interactions both between males and between females occurred with no visible  
294 involvement of the opposite sex. Interestingly, on two occasions males carrying tadpoles were also seen  
295 engaged in physical combats with other males.

296

## 297 **Discussion**

298

299 The purpose of this study was to provide basic information about various aspects of the natural history of  
300 *D. tinctorius* in the wild that could be used as background knowledge for future research on the  
301 behavioral ecology, evolution and conservation of the species. We describe their reproductive and social



302 behaviors, habitat use, and their remarkable colonization of tree-fall gaps as soon as they occur. The  
303 implications of these findings, as well as some hypotheses derived from our observations, are discussed  
304 below.

305

306 *Dendrobates tinctorius* males were most often found climbing, foraging, and hiding around forest  
307 structures, such as dead logs, fallen branches, roots, tree buttresses, and palm leaves. These structures are  
308 used as oviposition sites (this study), and are also the types of structures that accumulate rainwater,  
309 forming pools where newly hatched tadpoles are deposited (Rojas 2014). Females, in contrast, were more  
310 often found foraging on the ground in open areas. Sex differences in microhabitat use might thus be  
311 related to differences in parental duties, as males periodically attend developing clutches and are in charge  
312 of tadpole transport and deposition. Forest structures can also be used by both sexes as communal retreats  
313 during dry periods (Born et al. 2010), as has also been reported for *D. truncatus*, a closely related species  
314 (Gualdrón et al. 2016). Such microhabitat likely provides higher humidity and shelter from potential  
315 predators.

316

317 Males' association with structured habitats may also be the key reason why they are more likely to be  
318 found in tree-fall gaps long after their formation. A recent study reported higher tadpole deposition rates  
319 in pools at recent tree-fall gaps in comparison to pools in the closed forest (Rojas 2015), suggesting that  
320 the availability of new places for tadpole deposition is one of the drivers of tree-fall gap invasion in this  
321 species. However, the immediate arrival in tree-fall gaps is not exclusive of males. Females are as likely  
322 to get to new tree-fall gaps within the first three days of their formation (Fig. 4B), possibly attracted by  
323 the sudden abundance and diversity of food (pers. obs.); in fact, frogs captured in recently-formed tree-  
324 fall gaps have shown a tendency to have more prey items in their stomach than frogs caught in the closed  
325 forest (Born et al. 2010). Moreover, as suggested by Born et al. (2010), the simultaneous presence of  
326 many individuals (Fig. 4A) can make tree-fall gaps a perfect mating arena.

327 The mechanism by which these frogs detect and locate treefalls remains unknown. However, the sound  
328 and seismic cues produced during a treefall might be sufficient, as some frogs are known to detect  
329 vibrational signals from conspecifics (Lewis and Narins 1985; Caldwell et al. 2010), heterospecifics  
330 (Warkentin et al. 2007) and abiotic factors like rain (Caldwell et al. 2010); these three kinds of signals are  
331 presumably much weaker than those produced by a treefall. Low-frequency seismic cues could be  
332 detected at long distances but are short in duration; thus, it is possible that strong olfactory cues and light  
333 gradients produced by a fresh treefall provide the additional information needed for orientation.

334

335 One of the most unusual aspects of *D. tinctorius*' reproductive behavior, and likely one of the  
336 reasons why their behavior has been rarely studied in the wild (but see Born et al. 2010; Rojas 2014,  
337 2015; Rojas et al. 2014a for examples of field studies on the species), is the lack of advertisement calls.  
338 Most male frogs, including other dendrobatids, use calls to attract females and to repel rival males  
339 (Gerhardt and Huber 2002; Erdtmann and Amézquita 2009; Santos et al. 2014), making them also easier  
340 to locate by researchers. The structure of these calls shows great variation across the poison frog family  
341 (Erdtmann and Amézquita 2009), and a recent large-scale comparative study (Santos et al. 2014) argued  
342 that a reduced predation pressure has facilitated this diversification in acoustic signals in aposematic  
343 species. Paradoxically, and in contrast to the vast majority of frogs, aposematic *D. tinctorius* appears to  
344 have lost the advertisement function of its call altogether. Two closely related species, *D. auratus* and *D.*  
345 *truncatus*, also vocalize less frequently and at lower intensities than most other poison frogs, but still use  
346 calling both for territorial advertisement and courtship (Wells 1978; Summers 1989; Erdtmann and  
347 Amézquita 2009; Gualdrón-Duarte et al. 2016). What factors drove or facilitated the loss of typical  
348 calling behavior in *D. tinctorius* remains an intriguing evolutionary puzzle. Despite their toxicity, recent  
349 studies indicate that predation risk by naïve predators may still be an important selective pressure  
350 (Noonan and Comeault 2009; Comeault and Noonan 2011; Rojas et al. 2014b), suggesting that the  
351 increased exposure associated with prominent calling behavior should be selected against. However, this  
352 situation is not exclusive to *D. tinctorius*, and poison frogs in the genus *Oophaga*, for instance, have kept

353 their advertisement calls and an active vocal behavior despite their conspicuous coloration (Pröhl 2003;  
354 Vargas-Salinas and Amézquita 2013; Willink et al. 2013). On the other hand, male and female *D.*  
355 *tinctorius* tend to segregate in and around tree-fall gaps and other forest structures, potentially facilitating  
356 mating pair formation by direct encounter without the need of acoustic signals. We speculate that such  
357 microhabitat segregation and the availability of putative visual signals for communication in a diurnal  
358 colorful frog (discussed below) has promoted the loss of the advertisement call in *D. tinctorius*.

359 Male *D. tinctorius* use calls, however, in courtship and agonistic interactions. The courtship calls  
360 resembles a lower intensity version of calls produced by closely related species, such as *D. auratus* and *D.*  
361 *truncatus* (Wells 1978, Gualdrón et al. 2016; BR, pers. obs.). In addition to advertisement calls, many  
362 other dendrobatid frogs use soft courtship calls (e.g., Roithmair 1994), which are thought to facilitate the  
363 contact with the female during the prolonged courtship while reducing the potential detection and conflict  
364 with competitor males (Wells 2007). Courtship calls may also stimulate the ovulation in females, signal  
365 territory ownership or function as visual signals because of the slow and prominent vocal sac inflation. In  
366 *D. tinctorius*, males often take a distinct elevated posture when calling both during courtship and  
367 agonistic encounters, and this posture is retained at times in the absence of vocalizations. This so-called  
368 ‘upright posture’ is thought to function as a visual signal in both contexts (Hödl and Amézquita 2001).  
369 Visual signals (Summers et al. 1999, Santos et al. 2014, Narins et al. 2003, de Luna et al. 2010) and  
370 tactile interactions (Bourne et al. 2001, Pröhl & Hödl 1999, Summers 1992) have been long thought to  
371 play an important role in poison frog communication. Aspects of dorsal coloration, for example, are  
372 known to influence mating decisions (Summers et al. 1999; Maan and Cummings 2008) and agonistic  
373 encounters (Crothers et al. 2011) in at least one species of poison frog, *O. pumilio*. However, in *O.*  
374 *pumilio* and other species, acoustic signals still mediate the initial mate attraction (Lötters et al. 2003;  
375 Pröhl 2003; Dreher and Pröhl 2014) and male-male competition (Crump 1972; Bee 2003; Amézquita et  
376 al. 2006; Rojas et al. 2006; Tumulty et al. 2018). In the absence of advertisement calls, the use of tactile  
377 stimuli and both static (such as dorsal colour patterns) and dynamic visual signals most likely plays a  
378 predominant role in *D. tinctorius* communication. Dorsal color patterns might mediate mate choice

379 (Rojas 2017), given that individuals follow each other for a considerable amount of time while searching  
380 for a suitable place for oviposition. Males have been found to have a higher proportion of yellow in their  
381 dorsal area than females in our study population (Rojas and Endler 2013). This has been suggested to be  
382 particularly beneficial during tadpole transport (Rojas and Endler 2013), a task that requires long  
383 displacements and prolonged exposure, especially when climbing trees (A. Pasukonis, M. Loretto and B.  
384 Rojas, unpubl. data). Male coloration might thus indicate parental male quality and be subject to sexual  
385 selection (Rojas 2017). We suggest, however, that the variable coloration patterns on these frogs' front,  
386 forelimbs, and flanks, also have the potential to be used as signals, as a lot of the time the frogs are either  
387 facing or next to each other during courtship (Rojas 2012). These color patterns may also be used for  
388 species, sex, or even individual recognition from the distance. Individual recognition has not been shown  
389 in any amphibian, but the relatively complex social behavior, the lack of acoustic communication, and the  
390 repeated encounters in their shared micro-habitat might have promoted such ability in *D. tinctorius*.  
391 Both male and female *D. tinctorius* engage in intra-sex aggression that may escalate to intense physical  
392 combats, which involve chasing, wrestling and prolonged pressure over the opponent's head or dorsum.  
393 These types of behaviors have been also reported for the closely related *D. auratus* (Wells 1978;  
394 Summers 1989) and *D. leucomelas* (Summers 1992). Aggression in male poison frogs is usually a result  
395 of male competition for mates and territorial defense mediated by acoustic interactions (reviewed in Pröhl  
396 2005). To the best of our knowledge, males of all dendrobatid species studied to date show some degree  
397 of territoriality (Pröhl 2005). *Dendrobates tinctorius* seems also unusual in this respect, as they do not  
398 appear to defend exclusive areas. Similar to Born et al. (2010), we have observed males foraging in close  
399 proximity without aggressive escalations in large aggregations around fresh tree-fall gaps, as well as  
400 around structures where a few males might take refuge. We observed that the presence of individuals of  
401 the opposite sex, especially during courtship, was the cause of some of the agonistic encounters both  
402 between males and between females. Inter-female aggression has been also reported for *Mannophryne*  
403 *trinitatis* (Wells 1980), *D. auratus* (Wells 1978; Summers 1989), *D. leucomelas* (Summers 1992), and *O.*  
404 *pumilio* (Meuche et al. 2011). Just like in *D. tinctorius*, in the closely related *D. auratus*, tadpoles are

405 cannibalistic and males may deposit tadpoles from multiple clutches in the same pool (Summers 1989,  
406 1990). As suggested for *D. auratus*, female aggression thus might be the result of attempts to monopolize  
407 males and reduce the potential competition and risk of cannibalism by unrelated tadpoles in shared pools.  
408 Interestingly, we also observed aggressive interactions that seemingly did not involve a third individual,  
409 suggesting aggression triggers other than access to mates. These observations should, however, be  
410 interpreted with caution, as we cannot be certain that a third individual was not hiding in the area. In  
411 addition to mating context, aggression in some dendrobatid frogs has been linked to defense of shelter and  
412 feeding areas (Wells 1980; Meuche et al. 2011), but *D. tinctorius* does not appear to defend exclusive  
413 territories (Born et al. 2010). Some of the aggressive interactions resulted in the defeated individual being  
414 chased away, as if in a territorial displacement, but others terminated with both individuals continuing to  
415 forage nearby. This hints at an establishment of dominance hierarchies between opponents, which we  
416 suggest could be the result of repeated encounters of individuals in their shared microhabitat. Dominance  
417 hierarchies are well documented in all other vertebrates, where dominant individuals get preferential  
418 access to food, mates, and shelter (reviewed in Huntingford 2013). However, the formation of such  
419 potential hierarchies has not been described for any anuran species in the wild, despite being suggested to  
420 arise among poison frogs in captivity (Zimmermann and Zimmermann 1988) and to mediate conflict  
421 resolution in *O. lehmanni* (Rojas 2002). This is, therefore, a subject that merits further investigation.  
422 Aggressive behavior and territoriality in *D. tinctorius* might be context-dependent and related to  
423 population density, variation in food abundance and other resources, such as structures for shelter or  
424 oviposition. In the absence of vocalizations, *D. tinctorius* may be using visual signals to get information  
425 about the fighting abilities of their opponents, as it has been reported for male *O. pumilio* (Crothers et al.  
426 2011; Crothers and Cummings 2015), and settle their conflicts before escalating to physical combats  
427 (Rojas 2017). Social behavior in *D. tinctorius* is a promising avenue of research, which could provide  
428 insights into the evolution of visual communication and factors influencing anuran aggressive and  
429 territorial behavior in the absence of acoustic communication.

430 Egg clutches at our study site have high mortality and are much smaller than those reported in captivity,  
431 which may have up to 14 eggs (Lötters et al. 2007). This does not seem to be an exception, as levels of  
432 hatching failure of up to 80% have been previously reported for *O. pumilio* (Pröhl and Hödl 1999). Loss  
433 of most eggs or embryos is likely due to predation (e.g., Juncá and Rodrigues 2006), or to fungal  
434 infections (Fig 6B). On one occasion, we observed a female unrelated to the clutch on top of the missing  
435 eggs, indicating possible cannibalism. This behavior has been previously reported in *D. auratus* as a  
436 mechanism of intra-female competition (Summers 1989; 1990).

437 Upon hatching, males take tadpoles, either all of them or one at a time, to bodies of water. The latter is  
438 thought to be the case of most *Dendrobates*, although the evidence supporting this pattern comes mostly  
439 from observations in captivity (Lötters et al. 2007). Transport of single tadpoles, one by one, implies  
440 several trips between the place where clutch was laid and the pools, a task that has been shown to require  
441 remarkable spatial abilities (Pašukonis et al. 2016) and probably a high energetic cost (Beck et al. 2017).  
442 In *D. tinctorius*, males carry one or two (sometimes three) tadpoles at a time. In combination with the  
443 high clutch mortality rates observed, this suggests that males often take all the larvae that survive within a  
444 given clutch at once. However, we have observed at least a few instances in which males take one  
445 tadpole to a pool and then return to get the rest (A. Pašukonis, M. Loretto and B. Rojas, unpubl. data).  
446 Furthermore, males have been seen depositing one tadpole in the same pool where they had deposited  
447 another tadpole (Rojas 2014), which could also mean that males carrying two tadpoles at once are  
448 transporting tadpoles from different clutches. This is supported by the fact that tadpoles transported at the  
449 same time on a male's back differ significantly in size. In *D. auratus* for example, males have been seen  
450 moistening a fresh clutch and a hatching clutch within the same hour in captivity (Wells 1978), and  
451 attending multiple clutches of different stages in the field (Wells 1978; Summers 1990). However, these  
452 differences in size could also be inherent to within-clutch variation in hatching size. Size difference  
453 between tadpoles transported simultaneously was particularly noticeable in the tadpoles on the back of the  
454 only female found performing these duties. While rare (1 in >100 tadpole transport events reported here),

455 tadpole transport might be taken over by females if males go missing. This type of flexible compensation  
456 is known to occur in at least one other species of poison frog, *Allobates femoralis* (Ringler et al. 2015).  
457 As reported before, we observed tadpole deposition in different water-holding structures in the forest,  
458 from palm bracts on the ground to tree holes high up. However, the specific characteristics that influence  
459 pool choice by a male and favor successful tadpole development are currently unknown. It has been  
460 previously suggested that, despite the high levels of tadpole cannibalism, parents might use the presence  
461 of larger tadpoles as a cue of pool quality. Presence of large tadpoles may indicate that basic  
462 requirements, such as sufficient nutrients and water stability, have been met to allow tadpole development  
463 (Rojas 2014). Even less is understood about the role that *D. tinctorius* plays in the ecology of other  
464 phytotelm-breeding anurans, especially considering that most species are restricted to terrestrial or  
465 arboreal habitat; meanwhile, *D. tinctorius* and their carnivorous tadpoles are capable of exploiting pools  
466 at all heights (Gaucher 2002). How *D. tinctorius* finds canopy pools is unknown, but it has been  
467 speculated that they may eavesdrop on the calls of treefrog species such as *Trachycephalus resinifictrix*  
468 and *T. hadroceps*, which breed in arboreal water bodies (Gaucher 2002). We further hypothesize that  
469 enlarged male toe-pads (apt for climbing) and aposematic coloration gave *D. tinctorius* access to a wider  
470 variety of aquatic habitats despite being exposed to would-be predators for prolonged periods of time  
471 during tadpole transport.

472 Approximately 43% of the amphibian species worldwide are experiencing population declines (Stuart, et  
473 al. 2004), largely as a consequence of the spread of a deadly disease caused by the fungus  
474 *Batrachochytrium dendrobatidis* (*Bd*) (Lips et al. 2006; Lötters et al. 2009; Lips 2016; Bower et al. 2017).  
475 Despite having a low *Bd* prevalence compared to species in other families and regions (e.g. Flechas et al.  
476 2012), phytotelm-breeding dendrobatids, including *D. tinctorius*, have been found to have the highest  
477 prevalence of *Bd* in recent studies done in French Guiana, indicating that dendrobatid species may be  
478 more vulnerable to *Bd* infection than previously suspected (Courtois et al. 2015). Furthermore, the same  
479 study reports an increase in *Bd* prevalence in *D. tinctorius* between 2009 and 2012, hinting at a relatively  
480 recent *Bd* establishment and its current spread in French Guiana. While *Bd* research has been mostly



481 focused on adult frogs, it is known that tadpoles can also get infected due to their keratinized mouthparts  
482 (Berger et al. 1998; Blaustein et al. 2005). However, there is currently no information on *Bd* prevalence  
483 in *D. tinctorius* tadpoles, or studies assessing the presence of *Bd* in the pools where tadpoles develop,  
484 despite reports of *Bd* occurrence in phytotelmata and phytotelm-breeding frog species in other  
485 Neotropical areas such as Panama and Ecuador (Cossel and Lindquist 2009; McCracken et al. 2009).  
486 Furthermore, considering that dispersal of *Bd* outside large bodies of water may imply an amphibian  
487 vector (Kolby et al. 2015), we urge studies evaluating the role of *D. tinctorius* adults as *Bd* vectors across  
488 forest strata (i.e., from the ground to the canopy), and advocate that increasing our knowledge on the  
489 behavior and ecology of this species may improve our understanding on the dynamics of *Bd* transmission  
490 in their habitat.

491 Another major threat for anurans is habitat destruction (Cushman 2006). While our study population  
492 occurs within in a natural reserve, many populations of *D. tinctorius* are in unprotected areas, which are  
493 under threat primarily by gold mining-driven deforestation. It is estimated that approximately 41% (~684  
494 km<sup>2</sup>) of the deforestation in the South American tropical rainforest between 2001 and 2013 occurred in  
495 the so-called Guianan moist forest ecoregion due to gold mining activities (Alvarez-Berríos and Aide  
496 2015). Because *D. tinctorius* is often distributed in small patchy populations (Noonan and Gaucher  
497 2006), deforestation even at the small-scales used for gold mining, can have a detrimental, probably  
498 irreversible effect on the life histories and survival of this species and other phytotelm-breeders. We thus  
499 fully support the long-term monitoring strategies suggested by Courtois et al. (2015) and currently  
500 implemented across several nature reserves in French Guiana (e.g., [http://www.reserve-tresor.fr/en/our-](http://www.reserve-tresor.fr/en/our-actions/studies-and-surveys/herpetology)  
501 [actions/studies-and-surveys/herpetology](http://www.reserve-tresor.fr/en/our-actions/studies-and-surveys/herpetology)) to allow the timely assessment of changes in population size and  
502 sudden declines, especially of ‘sentinel species’ such as *D. tinctorius* (Courtois et al. 2013, 2015). These  
503 types of strategies, together with basic research on the natural history of threatened species are key, not  
504 only for the formulation of successful conservation policies, but also for the education and future  
505 engagement of public essential for the preservation of wildlife at a local scale.



506

## 507 **Additional Information and Declarations**

### 508 **Competing Interests**

509 The authors declare no competing interests.

510

### 511 **Author Contributions**

512 Both authors collected information in the field, analyzed data, and prepared figures for the paper. BR  
513 wrote a first draft of the manuscript, which was then edited and approved by AP.

514

### 515 **Animal Ethics**

516 Our research was approved and authorized by the scientific committee of the Nouragues Ecological  
517 Research Station. We strictly adhered to the current French and European Union law, and followed the  
518 ‘Guidelines for use of live amphibians and reptiles in the field and laboratory research’ by the  
519 Herpetological Animal Care and Use Committee (HACC) of the American Society of Ichthyologists and  
520 Herpetologists and the ‘Guidelines for the use of animals in teaching and research’ by the Association for  
521 the Study of Animal Behaviour (ASAB).

522

### 523 **Funding**

524 This study was funded by student allowances from the School of Psychology at the University of Exeter  
525 (UK) and the CIE at Deakin University (Australia) granted to BR; by Centre National de la Recherche  
526 Scientifique (CNRS), and by Investissement d’Avenir funds of the ANR (CEBA: ANR-10-LABX-25-01,  
527 ANAEE-France: ANR-11-INBS-0001) in the framework of the Nouragues Travel Grant granted to BR  
528 and AP; and by the Austrian Science Fund (FWF) project J3827-B29 in the framework of the Erwin  
529 Schrödinger Fellowship granted to AP. BR is currently funded by the Academy of Finland (Academy

530 Research Fellowship, Project No. 21000042021). AP is currently funded by Lauren O'Connell with  
531 Stanford University funds.

## 532 Supplementary videos

533 1. Tadpole transport and pool inspection

534 <https://youtu.be/KE5LB-2IsTU>

535

536 2. Cannibalism/tadpole aggression

537 <https://youtu.be/Utvrnqi-VOK>

538

539 3. Courtship

540 <https://youtu.be/gNIZLBpivMI>

541

542 4. Egg laying

543 <https://youtu.be/zf-4aOXeir0>

544

545 5. Male and female aggressive behavior

546 [https://www.youtube.com/watch?v=g5x\\_K0x7Lcg&feature=youtu.be](https://www.youtube.com/watch?v=g5x_K0x7Lcg&feature=youtu.be)

547

548

## 549 Acknowledgements

550 We are extremely grateful to John A. Endler and Walter Hödl for insightful and encouraging discussions  
551 on the importance of natural history studies. Jennifer Devillechabrolle, Diana Pizano, Oscar Ramos,  
552 Valentine Alt, and Matthias-Claudio Loretto provided invaluable field assistance. Philippe Gaucher,  
553 Mathias Fernandez, Gilles Peroz and the rest of Les Nouragues Ecological Research station staff helped

554 with logistics; P. G. also shared helpful information on many years observing these frogs in the wild. We  
555 are thankful to Eva Fischer for providing the excellent photo of the tadpole's mouthparts, Antoine  
556 Fouquet for providing photos of two populations of *D. tinctorius*, and Matthias-Claudio Loretto for  
557 courtship videos.

558

## 559 **References**

- 560 Alvarez-Berrios, N. L., and T. M. Aide. 2015. Global demand for gold is another threat for tropical  
561 forests. *Environmental research letters: ERL [Web site]* 10:014006.
- 562 Amézquita, A., L. Castellanos, and W. Hödl. 2005. Auditory matching of male *Epipedobates femoralis*  
563 (Anura: Dendrobatidae) under field conditions. *Animal behaviour* 70:1377–1386.
- 564 Amézquita, A., S. V. Flechas, A. P. Lima, H. Gasser, and W. Hödl. 2011. Acoustic interference and  
565 recognition space within a complex assemblage of dendrobatid frogs. *Proceedings of the National*  
566 *Academy of Sciences of the United States of America* 108:17058–17063.
- 567 Amézquita, A., W. Hödl, A. P. Lima, L. Castellanos, L. Erdtmann, and M. C. de Araújo. 2006. Masking  
568 interference and the evolution of the acoustic communication system in the Amazonian dendrobatid  
569 frog *Allobates femoralis*. *Evolution; international journal of organic evolution* 60:1874–1887.
- 570 Barnett, J. B., C. Michalis, N. E. Scott-Samuel, and I. C. Cuthill. 2018. Distance-dependent defensive  
571 coloration in the poison frog *Dendrobates tinctorius*, Dendrobatidae. *Proceedings of the National*  
572 *Academy of Sciences of the United States of America* 115:6416–6421.
- 573 Beck, K. B., M.-C. Loretto, M. Ringler, W. Hödl, and A. Pašukonis. 2017. Relying on known or  
574 exploring for new? Movement patterns and reproductive resource use in a tadpole-transporting frog.  
575 *PeerJ* 5:e3745.
- 576 Beeby, A. 2001. What do sentinels stand for? *Environmental pollution* 112:285–298.
- 577 Bee, M. A. 2003. A test of the “dear enemy effect” in the strawberry dart-poison frog (*Dendrobates*  
578 *pumilio*). *Behavioral ecology and sociobiology*.

- 579 Berger, L., R. Speare, P. Daszak, D. E. Green, A. A. Cunningham, C. L. Goggin, R. Slocombe, et al.  
580 1998. Chytridiomycosis causes amphibian mortality associated with population declines in the rain  
581 forests of Australia and Central America. *Proceedings of the National Academy of Sciences of the*  
582 *United States of America* 95:9031–9036.
- 583 Blaustein, A. R., J. M. Romansic, E. A. Scheessele, B. A. Han, A. P. Pessier, and J. E. Longcore. 2005.  
584 Interspecific Variation in Susceptibility of Frog Tadpoles to the Pathogenic Fungus *Batrachochytrium*  
585 *dendrobatidis*. *Conservation biology: the journal of the Society for Conservation Biology* 19:1460–  
586 1468.
- 587 Boersma, P., and D. Weenink. 2014. Praat: Doing Phonetics by Computer [Computer software]. Version  
588 5.3. 84.
- 589 Born, M., F. Bongers, E. H. Poelman, and F. J. Sterck. 2010. Dry-season retreat and dietary shift of the  
590 dart-poison frog *Dendrobates tinctorius* (Anura: Dendrobatidae). *Phyllomedusa: journal of neotropical*  
591 *herpetology* 9:37–52.
- 592 Bower, D. S., K. R. Lips, L. Schwarzkopf, A. Georges, and S. Clulow. 2017. Amphibians on the brink.  
593 *Science* 357:454–455.
- 594 Brodie, E. D., and M. S. Tumbarello. 1978. The antipredator functions of *Dendrobates auratus*  
595 (Amphibia, Anura, Dendrobatidae) skin secretion in regard to a snake predator (*Thamnophis*). *Journal*  
596 *of herpetology* 12:264–265.
- 597 Brown, J. L., V. Morales, and K. Summers. 2010. A key ecological trait drove the evolution of biparental  
598 care and monogamy in an amphibian. *The American naturalist* 175:436–446.
- 599 Brown, J. L., E. Twomey, A. Amezcuita, M. B. de Souza, J. P. Caldwell, S. Loetters, R. May, et al. 2011.  
600 A taxonomic revision of the Neotropical poison frog genus *Ranitomeya* (Amphibia: Dendrobatidae).  
601 *Zootaxa* 3083:1–120.
- 602 Caldwell, J. P. 1997. Pair bonding in spotted poison frogs. *Nature* 385:211.
- 603 Caldwell, M. S., G. R. Johnston, J. G. McDaniel, and K. M. Warkentin. 2010. Vibrational signaling in the  
604 agonistic interactions of red-eyed treefrogs. *Current biology: CB* 20:1012–1017.

- 605 Comeault, A. A., and B. P. Noonan. 2011. Spatial variation in the fitness of divergent aposematic  
606 phenotypes of the poison frog, *Dendrobates tinctorius*. *Journal of evolutionary biology* 24:1374–1379.
- 607 Cossel, J. O., Jr, and E. D. Lindquist. 2009. AMPHIBIAN DISEASES-Batrachochytrium dendrobatidis in  
608 Arboreal and Lotic Water Sources in Panama. *Herpetological review*.
- 609 Courtois, E. A., J. Devillechabrolle, M. Dewynter, K. Pineau, P. Gaucher, and J. Chave. 2013. Monitoring  
610 strategy for eight amphibian species in French Guiana, South America. *PloS one* 8:e67486.
- 611 Courtois, E. A., P. Gaucher, J. Chave, and D. S. Schmeller. 2015. Widespread occurrence of bd in French  
612 Guiana, South America. *PloS one* 10:e0125128.
- 613 Courtois, E. A., K. Pineau, B. Villette, D. S. Schmeller, and P. Gaucher. 2012. Population estimates of  
614 *Dendrobates tinctorius* (Anura: Dendrobatidae) at three sites in French Guiana and first record of  
615 chytrid infection. *Phyllomedusa: journal of neotropical herpetology* 11:63–70.
- 616 Crothers, L., E. Gering, and M. Cummings. 2011. Aposematic signal variation predicts male–male  
617 interactions in a polymorphic poison frog. *Evolution; international journal of organic evolution*.
- 618 Crothers, L. R., and M. E. Cummings. 2015. A multifunctional warning signal behaves as an agonistic  
619 status signal in a poison frog. *Behavioral ecology: official journal of the International Society for*  
620 *Behavioral Ecology* 26:560–568.
- 621 Crump, M. L. 1972. Territoriality and Mating Behavior in *Dendrobates granuliferus* (Anura:  
622 *Dendrobatidae*). *Herpetologica* 28:195–198.
- 623 Cushman, S. A. 2006. Effects of habitat loss and fragmentation on amphibians: A review and prospectus.  
624 *Biological conservation* 128:231–240.
- 625 Daly, J. W., C. W. Myers, and N. Whittaker. 1987. Further classification of skin alkaloids from  
626 neotropical poison frogs (*Dendrobatidae*), with a general survey of toxic/noxious substances in the  
627 amphibia. *Toxicon: official journal of the International Society on Toxinology* 25:1023–1095.
- 628 Donnelly, M. A. 1989. Effects of reproductive resource supplementation on space-use patterns in  
629 *Dendrobates pumilio*. *Oecologia* 81:212–218.
- 630 Dreher, C. E., and H. Pröhl. 2014. Multiple sexual signals: calls over colors for mate attraction in an

- 631       aposematic, color-diverse poison frog. *Frontiers in Ecology and Evolution* 2:3224.
- 632       Endler, J. A. 2015. Writing scientific papers, with special reference to Evolutionary Ecology.
- 633       *Evolutionary ecology* 29:465–478.
- 634       Erdtmann, L., and A. Amézquita. 2009. Differential Evolution of Advertisement Call Traits in Dart-
- 635       Poison Frogs (Anura: Dendrobatidae). *Ethology: formerly Zeitschrift für Tierpsychologie* 115:801–811.
- 636       Fandiño, M. C., H. Lüddecke, and A. Amézquita. 1997. Vocalisation and larval transportation of male
- 637       *Colostethus subpunctatus* (Anura: Dendrobatidae). *Amphibia-reptilia: publication of the Societas*
- 638       *Europaea Herpetologica* 18:39–48.
- 639       Flechas, S. V., C. Sarmiento, and A. Amézquita. 2012. Bd on the Beach: high prevalence of
- 640       *Batrachochytrium dendrobatidis* in the lowland forests of Gorgona island (Colombia, South America).
- 641       *Ecohealth* 9:298-302.
- 642       Forsman, A., and M. Hagman. 2006. Calling is an honest indicator of paternal genetic quality in poison
- 643       frogs. *Evolution; international journal of organic evolution* 60:2148–2157.
- 644       Gaucher, P. 2002. Premières données sur *Phrynohyas hadroceps*, Rainette arboricole du plateau des
- 645       Guyanes (Amphibia:Anura:Hylidae) (Révision taxonomique, éco-éthologie de la reproduction).
- 646       Gerhardt, C. H., and F. Huber. 2002. *Acoustic Communication in Insects and Anurans: Common*
- 647       *Problems and Diverse Solutions*. University of Chicago Press.
- 648       Gorzula, S. 1996. The Trade in Dendrobatid Frogs. *Herpetological review* 27:3.
- 649       Grant, T., D. R. Frost, J. P. Caldwell, R. Gagliardo, C. F. B. Haddad, P. J. R. Kok, D. B. Means, et al.
- 650       2006. Phylogenetic systematics of dart-poison frogs and their relatives (Amphibia: Athesphatanura:
- 651       Dendrobatidae). *Bulletin of the American Museum of Natural History* 1–262.
- 652       Gualdrón-Duarte, J. E., V. F. Luna-Mora, and Rivera-Correa M Kahn T. 2016. Yellow-striped Poison
- 653       Frog *Dendrobates truncatus* (Cope, 1861 “1860”). Pages 323–328 in T. R. Kahn, E. La Marca, S.
- 654       Lötters, J. L. Brown, E. Towney, and A. Amézquita, eds. *Aposematic Poison Frogs (Dendrobatidae) of*
- 655       *the Andean Countries: Bolivia, Colombia, Ecuador, Perú and Venezuela*, Conservation International
- 656       *Tropical Field Guides Series*. Conservation International, Arlington. USA.

- 657 Hödl, W., and A. Amézquita. 2001. Visual signaling in anuran amphibians. *Anuran communication* 121–  
658 141.
- 659 Hödl, W., A. Amézquita, and P. M. Narins. 2004. The role of call frequency and the auditory papillae in  
660 phonotactic behavior in male Dart-poison frogs *Epipedobates femoralis* (Dendrobatidae). *Journal of*  
661 *comparative physiology. A, Neuroethology, sensory, neural, and behavioral physiology* 190:823–829.  
662 Hoogmoed, M., and Avila-Pires, T. C. S. 2012. Inventory of color polymorphism in populations of  
663 *Dendrobates galactonotus* (Anura: Dendrobatidae), a poison frog endemic to Brazil. *Phyllomedusa*  
664 11:95-115.
- 665 Huntingford, F. A. 2013. *Animal Conflict*. Springer Science & Business Media.
- 666 Juncá, F. A., and M. T. Rodrigues. 2006. The reproductive success of *Colostethus stepheni* (Anura:  
667 Dendrobatidae). *Studies on neotropical fauna and environment* 41:9–17.
- 668 Kolby, J. E., S. D. Ramirez, L. Berger, K. L. Richards-Hrdlicka, M. Jocque, and L. F. Skerratt. 2015.  
669 Terrestrial Dispersal and Potential Environmental Transmission of the Amphibian Chytrid Fungus  
670 (*Batrachochytrium dendrobatidis*). *PloS one* 10:e0125386.
- 671 Lewis, E. R., and P. M. Narins. 1985. Do frogs communicate with seismic signals? *Science* 227:187–189.
- 672 Lips, K. R. 2016. Overview of chytrid emergence and impacts on amphibians. *Philosophical transactions*  
673 *of the Royal Society of London. Series B, Biological sciences* 371.
- 674 Lips, K. R., F. Brem, R. Brenes, J. D. Reeve, R. A. Alford, J. Voyles, C. Carey, et al. 2006. Emerging  
675 infectious disease and the loss of biodiversity in a Neotropical amphibian community. *Proceedings of*  
676 *the National Academy of Sciences of the United States of America* 103:3165–3170.
- 677 Longcore, J. E., A. P. Pessier, and D. K. Nichols. 1999. *Batrachochytrium Dendrobatidis gen. et sp. nov.*,  
678 a Chytrid Pathogenic to Amphibians. *Mycologia* 91:219–227.
- 679 Lötters, S., K.-H. Jungfer, F. W. Henkel, and W. Schmidt. 2007. *Poison Frogs: Biology, Species &*  
680 *Captive Care*. Edition Chimaira.
- 681 Lötters, S., J. Kielgast, J. Bielby, S. Schmidlein, J. Bosch, M. Veith, S. F. Walker, et al. 2009. The link  
682 between rapid enigmatic amphibian decline and the globally emerging chytrid fungus. *EcoHealth*

- 683 6:358–372.
- 684 Lötters, S., S. Reichle, and K.-H. Jungfer. 2003. Advertisement calls of Neotropical poison frogs  
685 (Amphibia: Dendrobatidae) of the genera *Colostethus*, *Dendrobates* and *Epipedobates*, with notes on  
686 dendrobatid call classification. *Journal of natural history* 37:1899–1911.
- 687 Maan, M. E., and M. E. Cummings. 2008. Female preferences for aposematic signal components in a  
688 polymorphic poison frog. *Evolution; international journal of organic evolution* 62:2334–2345.
- 689 Maan, M. E., and M. E. Cummings. 2009. Sexual dimorphism and directional sexual selection on  
690 aposematic signals in a poison frog. *Proceedings of the National Academy of Sciences of the United*  
691 *States of America* 106:19072–19077.
- 692 McCracken, S., J. P. Gaertner, and M. R. J. Forstner. 2009. Detection of *Batrachochytrium dendrobatidis*  
693 in amphibians from the forest floor to the upper canopy of an Ecuadorian Amazon lowland rainforest.  
694 *Herpetological*.
- 695 Meuche, I., K. E. Linsenmair, and H. Pröhl. 2011. Female Territoriality in the Strawberry Poison Frog  
696 (*Oophaga pumilio*). *Copeia* 2011:351–356.
- 697 Myers, C. W., and J. W. Daly. 1976. Preliminary evaluation of skin toxins and vocalizations in taxonomic  
698 and evolutionary studies of poison-dart frogs (Dendrobatidae). *Bulletin of the AMNH*; v. 157, article 3.
- 699 Myers, C. W., and J. W. Daly. 1980. Taxonomy and ecology of *Dendrobates bombetes*, a new Andean  
700 poison frog with new skin toxins. *American Museum novitates*; no. 2692.
- 701 Myers, C. W., and J. W. Daly. 1983. Dart-poison frogs. *Scientific American* 248:96–105.
- 702 Myers, C. W., J. W. Daly, and B. Malkin. 1978. A dangerously toxic new frog (*Phyllobates*) used by  
703 Emberá indians of western Colombia, with discussion of blowgun fabrication and dart poisoning. *Bull.*  
704 *Amer. Mus. Nat. Hist.* 161:309-365.
- 705 Nijman, V., and C. R. Shepherd. 2010. The role of Asia in the global trade in CITES II-listed poison  
706 arrow frogs: hopping from Kazakhstan to Lebanon to Thailand and beyond. *Biodiversity and*  
707 *conservation* 19:1963–1970.
- 708 Noonan, B. P., and A. A. Comeault. 2009. The role of predator selection on polymorphic aposematic



- 709     poison frogs. *Biology letters* 5:51–54.
- 710     Noonan, B. P., and P. Gaucher. 2006. Refugial isolation and secondary contact in the dyeing poison frog  
711     *Dendrobates tinctorius*. *Molecular ecology* 15:4425–4435.
- 712     Pašukonis, A., K. Trenkwalder, M. Ringler, E. Ringler, R. Mangione, J. Steininger, I. Warrington, et al.  
713     2016. The significance of spatial memory for water finding in a tadpole-transporting frog. *Animal*  
714     *behaviour* 116:89–98.
- 715     Pašukonis, A., I. Warrington, M. Ringler, and W. Hödl. 2014. Poison frogs rely on experience to find the  
716     way home in the rainforest. *Biology letters* 10:20140642.
- 717     Pröhl, H. 2002. Population differences in female resource abundance, adult sex ratio, and male mating  
718     success in *Dendrobates pumilio*. *Behavioral ecology: official journal of the International Society for*  
719     *Behavioral Ecology* 13:175–181.
- 720     Pröhl, H. 2003. Variation in male calling behaviour and relation to male mating success in the strawberry  
721     poison frog (*Dendrobates pumilio*). *Ethology* 109:273–290.
- 722     Pröhl, H. 2005. Territorial Behavior in Dendrobatid Frogs. *Journal of herpetology* 39:354–365.
- 723     Pröhl, H., and W. Hödl. 1999. Parental investment, potential reproductive rates, and mating system in the  
724     strawberry dart-poison frog, *Dendrobates pumilio*. *Behavioral ecology and sociobiology* 46:215–220.
- 725     Ringler, E., A. Pašukonis, W. T. Fitch, L. Huber, W. Hödl, and M. Ringler. 2015. Flexible compensation  
726     of uniparental care: female poison frogs take over when males disappear. *Behavioral ecology* 26:1219–  
727     1225.
- 728     Roithmair, M. E. 1994. Field studies on reproductive behaviour in two dart-poison frog species  
729     (*Epipedobates femoralis*, *Epipedobates trivittatus*) in Amazonian Peru. *Herpetological Journal* 4:77–85.
- 730     Rojas, B. 2002. Intrinsic determinants of the outcome of agonistic encounters in the poison-arrow frog  
731     *Dendrobates lehmanni* (Anura: Dendrobatidae). B.Sc. Thesis, University of Los Andes, Bogota,  
732     Colombia, 36 p.
- 733     Rojas, B. 2014. Strange parental decisions: fathers of the dyeing poison frog deposit their tadpoles in  
734     pools occupied by large cannibals. *Behavioral Ecology and Sociobiology* 68:551–559.

- 735 Rojas, B. 2014. 2015. Mind the gap: treefalls as drivers of parental tradeoffs. *Ecology and evolution*  
736 5:4028–4036.
- 737 Rojas, B. 2017. Behavioural, ecological, and evolutionary aspects of diversity in frog colour patterns.  
738 *Biological Reviews* 92:1059–1080.
- 739 Rojas, B., A. Amézquita, and A. Delgadillo. 2006. Matching and symmetry in the frequency recognition  
740 curve of the poison frog *Epipedobates trivittatus*. *Ethology* 112:564–571.
- 741 Rojas, B., J. Devillechabrolle, and J. A. Endler. 2014a. Paradox lost: variable colour-pattern geometry is  
742 associated with differences in movement in aposematic frogs. *Biology Letters* 10:20140193.
- 743 Rojas, B., and J. A. Endler. 2013. Sexual dimorphism and intra-populational colour pattern variation in  
744 the aposematic frog *Dendrobates tinctorius*. *Evolutionary Ecology* 27:739–753.
- 745 Rojas, B., P. Rautiala, and J. Mappes. 2014b. Differential detectability of polymorphic warning signals  
746 under varying light environments. *Behavioural Processes* 109 B:164–172.
- 747 RStudio Team. 2015. RStudio: integrated development for R.
- 748 Santos, J. C., M. Baquero, C. Barrio-Amorós, L. A. Coloma, L. K. Erdtmann, A. P. Lima, and D. C.  
749 Cannatella. 2014. Aposematism increases acoustic diversification and speciation in poison frogs.  
750 *Proceedings of the Royal Society of London B* 281:20141761.
- 751 Santos, J. C., L. A. Coloma, and D. C. Cannatella. 2003. Multiple, recurring origins of aposematism and  
752 diet specialization in poison frogs. *Proceedings of the National Academy of Sciences* 100:12792–  
753 12797.
- 754 Schmidt, W., and F. W. Henkel. 1995. Pfeilgiftfrösche im Terrarium. Landbuch-Verlag.
- 755 Schneider, C. A., W. S. Rasband, and K. W. Eliceiri. 2012. NIH Image to ImageJ: 25 years of image  
756 analysis. *Nature Methods* 9:671–675.
- 757 Silverstone, P. A. 1973. Observations on the Behavior and Ecology of a Colombian Poison-Arrow Frog,  
758 the Kōkoé-Pá (*Dendrobates histrionicus* Berthold). *Herpetologica* 29:295–301.
- 759 Silverstone, P. A. 1975. A revision of the poison-arrow frogs of the genus *Dendrobates* Wagler. Revisión  
760 de las ranas venenosas del género *Dendrobates* Wagler. *Natural history* 21:1–55.

- 761 Summers, K. 1989. Sexual selection and intra-female competition in the green poison-dart frog,  
762 *Dendrobates auratus*. *Animal behaviour* 37:797–805.
- 763 ———. 1990. Paternal care and the cost of polygyny in the green dart-poison frog. *Behavioral Ecology*  
764 *and Sociobiology* 27:307–313.
- 765 ———. 1992. Mating strategies in two species of dart-poison frogs: a comparative study. *Animal*  
766 *behaviour* 43:907–919.
- 767 Summers, K., R. Symula, M. Clough, and T. Cronin. 1999. Visual mate choice in poison frogs.  
768 *Proceedings. Biological sciences / The Royal Society* 266:2141–2145.
- 769 Tarvin, R. D., C. M. Borghese, W. Sachs, J. C. Santos, Y. Lu, L. A. O’Connell, D. C. Cannatella, et al.  
770 2017. Interacting amino acid replacements allow poison frogs to evolve epibatidine resistance. *Science*  
771 357:1261–1266.
- 772 Team, R. C. 2014. R: A language and environment for statistical computing. Vienna, Austria: R  
773 Foundation for Statistical Computing; 2014.
- 774 Tewksbury, J. J., J. G. T. Anderson, J. D. Bakker, T. J. Billo, P. W. Dunwiddie, M. J. Groom, S. E.  
775 Hampton, et al. 2014. Natural History’s Place in Science and Society. *Bioscience* 64:300–310.
- 776 Tumulty, J. P., A. Pašukonis, M. Ringler, J. D. Forester, W. Hödl, and M. A. Bee. 2018. Brilliant-thighed  
777 poison frogs do not use acoustic identity information to treat territorial neighbours as dear enemies.  
778 *Animal behaviour* 141:203–220.
- 779 Vargas-Salinas, F., and A. Amézquita. 2013. Stream noise, hybridization, and uncoupled evolution of call  
780 traits in two lineages of poison frogs: *Oophaga histrionica* and *Oophaga lehmanni*. *PloS one* 8:e77545.
- 781 Warkentin, K. M., M. S. Caldwell, T. D. Siok, A. T. D’Amato, and J. G. McDaniel. 2007. Flexible  
782 information sampling in vibrational assessment of predation risk by red-eyed treefrog embryos. *The*  
783 *Journal of experimental biology* 210:614–619.
- 784 Wells, K. D. 1978. Courtship and Parental Behavior in a Panamanian Poison-Arrow Frog (*Dendrobates*  
785 *auratus*). *Herpetologica* 34:148–155.
- 786 Wells, K. D. 1980. Social Behavior and Communication of a Dendrobatid Frog (*Colostethus trinitatis*).

- 787 Herpetologica 36:189–199.
- 788 Wells, K. D. 2007. *The Ecology and Behavior of Amphibians*. University of Chicago Press.
- 789 Willink, B., E. Brenes-Mora, F. Bolaños, and H. Pröhl. 2013. Not everything is black and white: color  
790 and behavioral variation reveal a continuum between cryptic and aposematic strategies in a  
791 polymorphic poison frog. *Evolution; international journal of organic evolution* 67:2783–2794.
- 792 Wollenberg, K. C., S. Lötters, C. Mora-Ferrer, and M. Veith. 2008. Disentangling composite colour  
793 patterns in a poison frog species. *Biological journal of the Linnean Society. Linnean Society of London*  
794 93:433–444.
- 795 Wollenberg, K. C., M. Veith, B. P. Noonan, S. Lötters, and J. M. Quattro. 2006. Polymorphism Versus  
796 Species Richness—systematics of Large *Dendrobates* from the Eastern Guiana Shield (Amphibia:  
797 Dendrobatidae). *Copeia* 2006:623–629.
- 798 Zimmermann, H., and E. Zimmermann. 1988. Etho-Taxonomie und zoogeographische  
799 artengruppenbildung bei pfeilgiftfröschen (Anura: Dendrobatidae). *Salamandra* 24:125–160.

800

## 801 **Figure legends**

802 **FIGURE 1.** Colour pattern variation (a) within the studied population and (b-e) between different  
803 populations of the dyeing poison frog in French Guiana. (a) Top row males, bottom row females. Lines  
804 on the background paper mark 5 mm. Note the enlarged toe discs in males, but overall larger female body  
805 size. Photos by: A. Pašukonis and Matthias-Claudio Loretto (a: Nouragues nature reserve, French  
806 Guiana), A. Fouquet (c: Bakhuis, Suriname; d: Mt. Galbao, French Guiana), and B. Rojas (b: Mt.  
807 Matoury, French Guiana; e: Mt. Bruyere, French Guiana).

808

809 **FIGURE 2.** Examples of phytotelmata used as tadpole deposition sites at the studied population. Photos  
810 by: B. Rojas (a, c) and A. Pašukonis (b, d).

811

812 **FIGURE 3.** Habitat use in relation to sex. Numbers in the boxes indicate the total number of individuals in  
813 each category (N =109).

814

815 **FIGURE 4.** Dozens of adult *D. tinctorius* can aggregate at once at a newly formed treefall gap. There are  
816 no sex differences in arrival within the first three days of gap formation (a), but males are more likely to  
817 be found in treefall gaps in the long term (b).

818

819 **FIGURE 5.** (a) Example of tactile interactions observed in *D. tinctorius* during courtship: a female with a  
820 limb on a male's head. (b) Waveform and (c) spectrogram of *D. tinctorius* call recorded from close range  
821 (approx. 30 cm) during courtship. The normalised waveform reveals the relative amplitude modulation  
822 and the pulsating structure of the call (pulse rate = 154 Hz); the spectrogram (FFT window length = 0.01  
823 s, Gaussian window, frequency range 0 - 6000 Hz) show the broadband spectral structure of the call with  
824 dominant frequency band centered around 3150 Hz. Photo by: B. Rojas.

825

826 **FIGURE 6.** Clutch development in *D. tinctorius* in the field. (a) Freshly laid clutch of 5 eggs; (b) The same  
827 clutch five days later. Note that two of the initial eggs have been infected by fungus; (c) 15 days after egg  
828 laying, two surviving tadpoles are ready to be picked by the male and taken to a body of water where they  
829 will continue to develop until metamorphosis; (d) A tadpole attached to the male's back. Photos by: A.

830 Pašukonis.

831

832 **FIGURE 7.** (a) A cannibalistic tadpole with the remainings of its victim; (b) oral apparatus (anterior side  
833 up) of a stage 25 (Gosner 1960) *D. tinctorius* tadpole. Photos by: B. Rojas (a) and E. K. Fischer (b).

834

835 **FIGURE 8.** A male (a) and a (exceptional) female (b) with tadpoles on their back (indicated by white  
836 arrows). (c) Most individuals were found carrying one tadpole, but two and three tadpoles can also be  
837 carried at once. (d) Tadpoles transported simultaneously differ significantly in size. Photos by: B. Rojas.

838

839 **FIGURE 9.** Sequence of an agonistic encounter between two male *D. tinctorius*. Physical combats involve  
840 wrestling, pressing the opponent against the substrate (with either the forelimbs or the whole body), and  
841 kicking. Occasionally males also vocalize during fighting, as seen by the inflated vocal sac in the middle  
842 photograph. Photos by: B. Rojas.

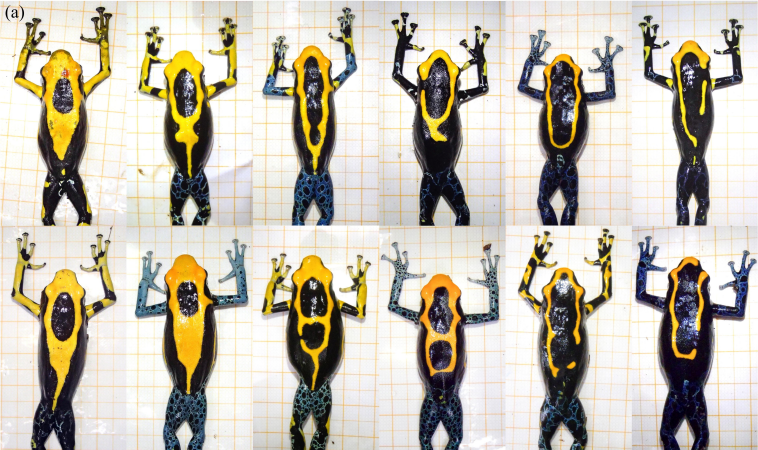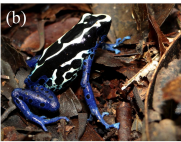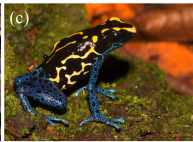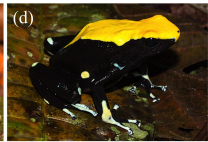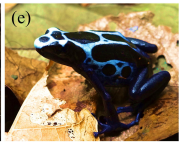



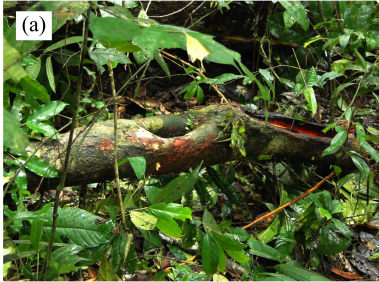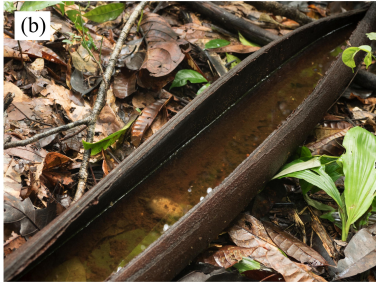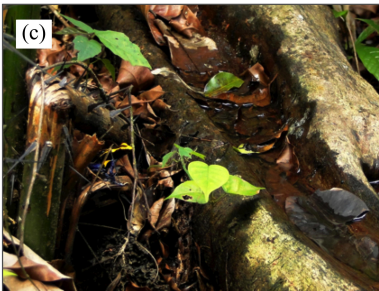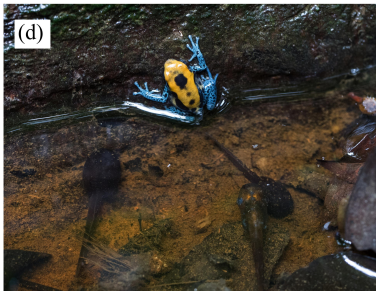



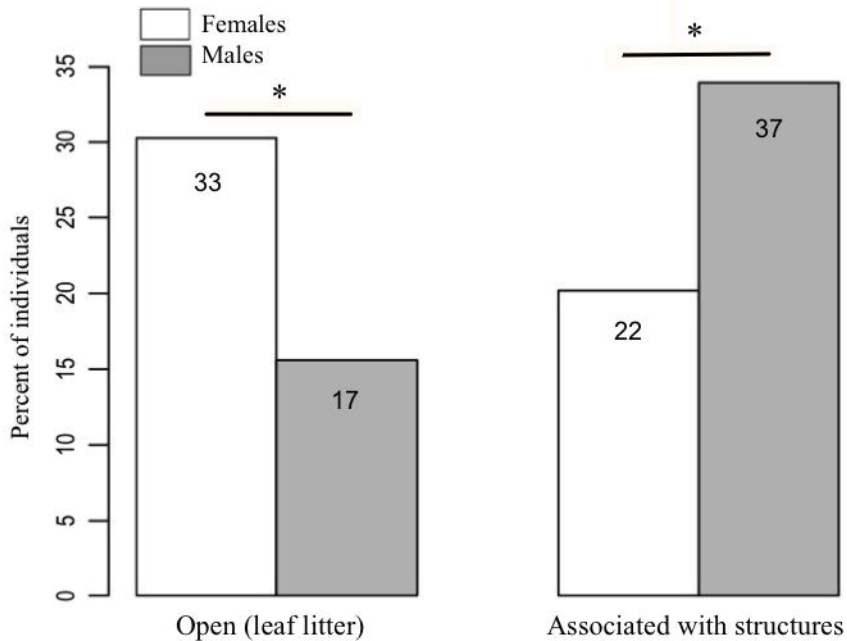

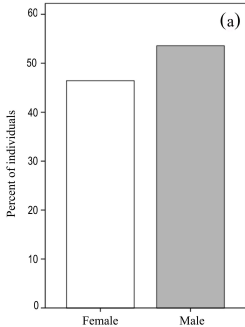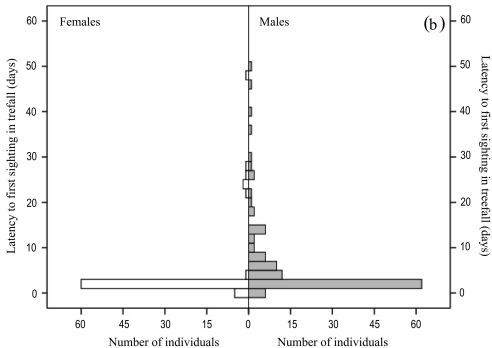

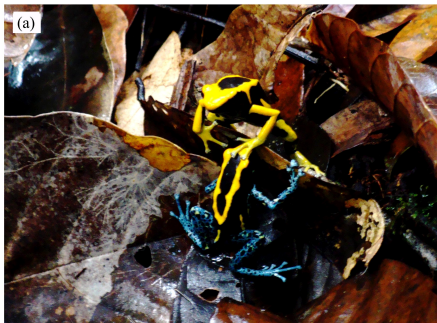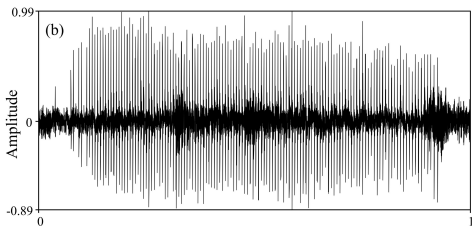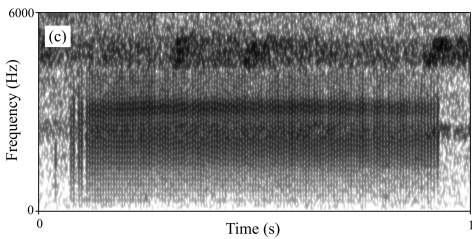

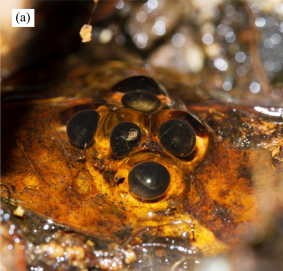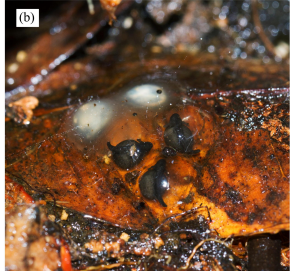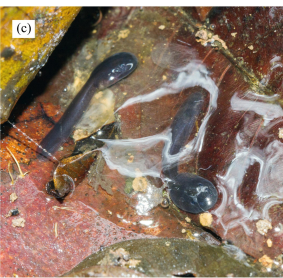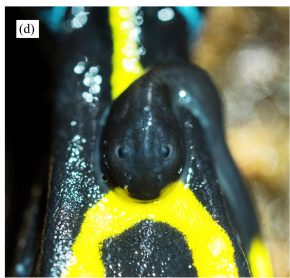

(a)

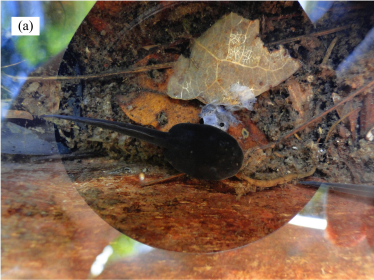

(b)

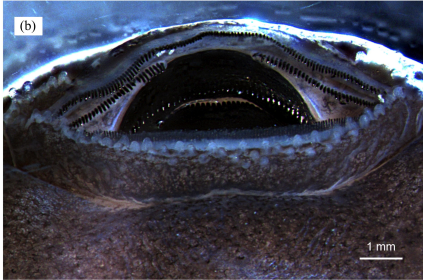

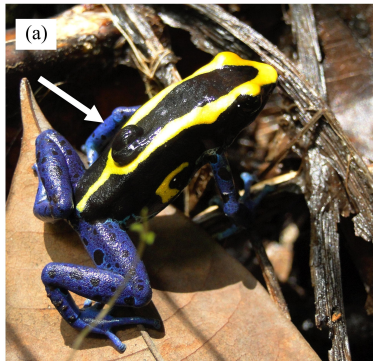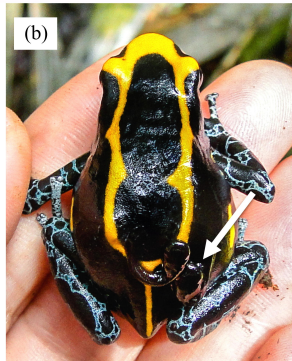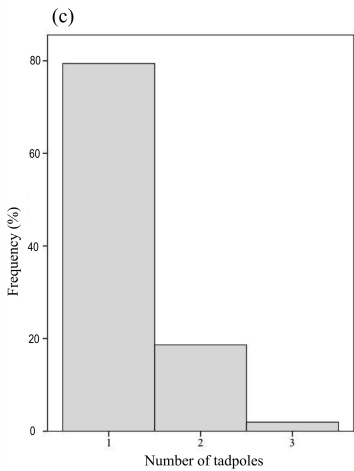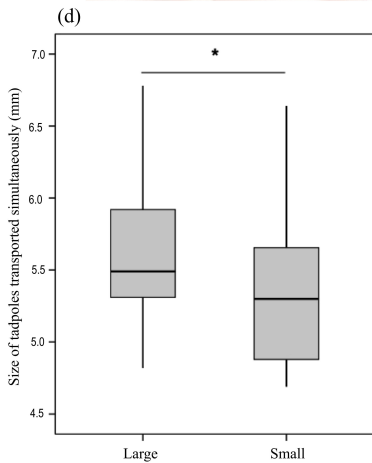

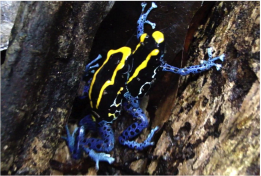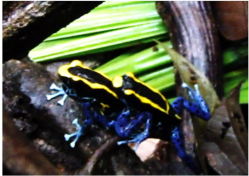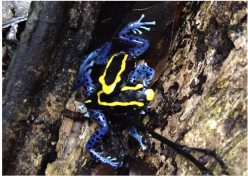

Source: https://www.biorxiv.org/content/10.1101/515122v1.full.pdf
